# Supplementary material for: Chromaticity-tunable phosphor-in-glass for long-lifetime high-power warm w-LEDs
Source: Royal Society of Chemistry journal article supplement (doi:10.1039/c5tc01057h), 2015-01-01
Supplement: c5tc01057h1.pdf [file c5tc01057h1.pdf]

# **Supporting Information**

## **Chromaticity-Tunable Phosphor-in-Glass for Long-lifetime High-Powered Warm W-LEDs**

Hui Chen,<sup>ac</sup> Hang Lin\*,<sup>ab</sup> Ju Xu,<sup>ab</sup> Bo Wang,<sup>a</sup> Zebin Lin,<sup>a</sup> Jiangcong Zhou,<sup>a</sup>

Yuansheng Wang\*<sup>ab</sup>

<sup>a</sup> Key Laboratory of Design and Assembly of Functional Nanostructures, Fujian Institute of Research on the Structure of Matter, Chinese Academy of Sciences; University of Chinese Academy of Sciences, Fuzhou, Fujian, 350002 (P. R. China);

<sup>b</sup> Fujian Provincial Key Laboratory of Nanomaterials, Fuzhou, Fujian, 350002 (P. R. China)

<sup>c</sup> College of Materials Science and Engineering, Fujian Normal University, Fuzhou, Fujian, 350007 (P. R. China)

\* Authors to whom correspondence should be addressed:

E-mail: lingh@fjirsm.ac.cn; Tel/Fax: +86-591-83751401

E-mail: yswang@fjirsm.ac.cn; Tel/Fax: +86-591-83705402

---

E-mail: lingh@fjirsm.ac.cn; Tel/Fax: +86-591-83751401

E-mail: yswang@fjirsm.ac.cn; Tel/Fax: +86-591-83705402

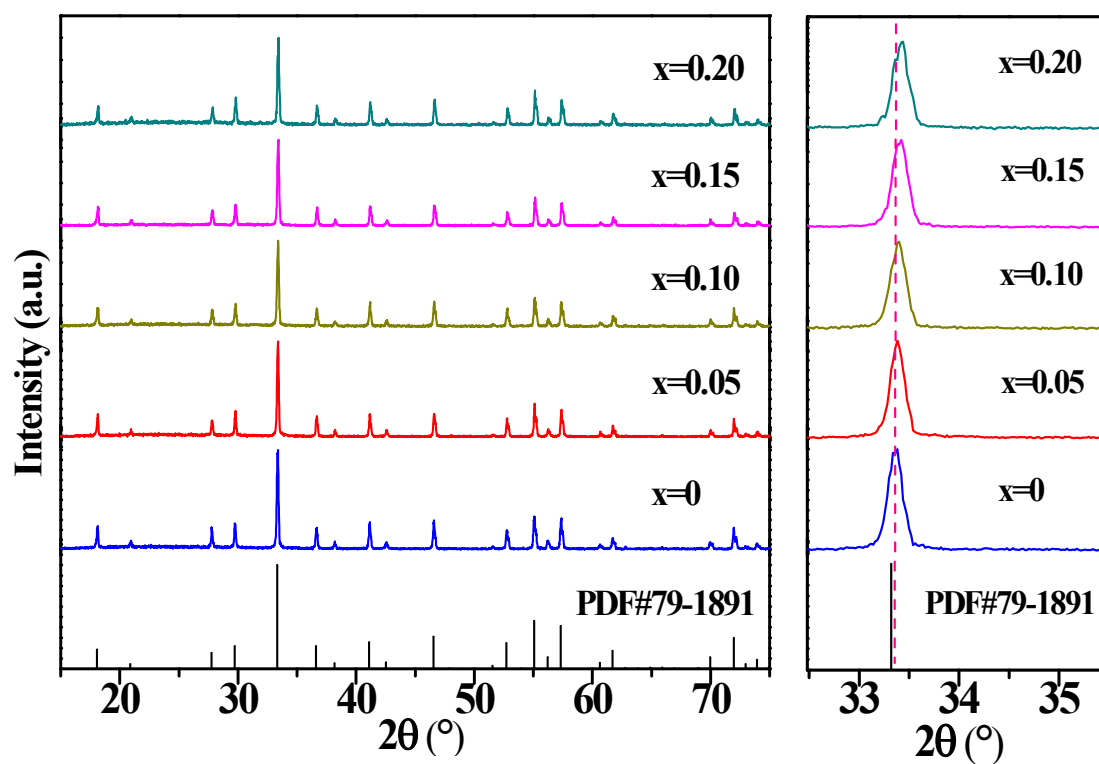

**Figure S1.** XRD patterns of YAG: 0.06 Ce<sup>3+</sup>, xMn<sup>2+</sup>, xSi<sup>4+</sup> samples and the magnified region of 32.5°-35.5°

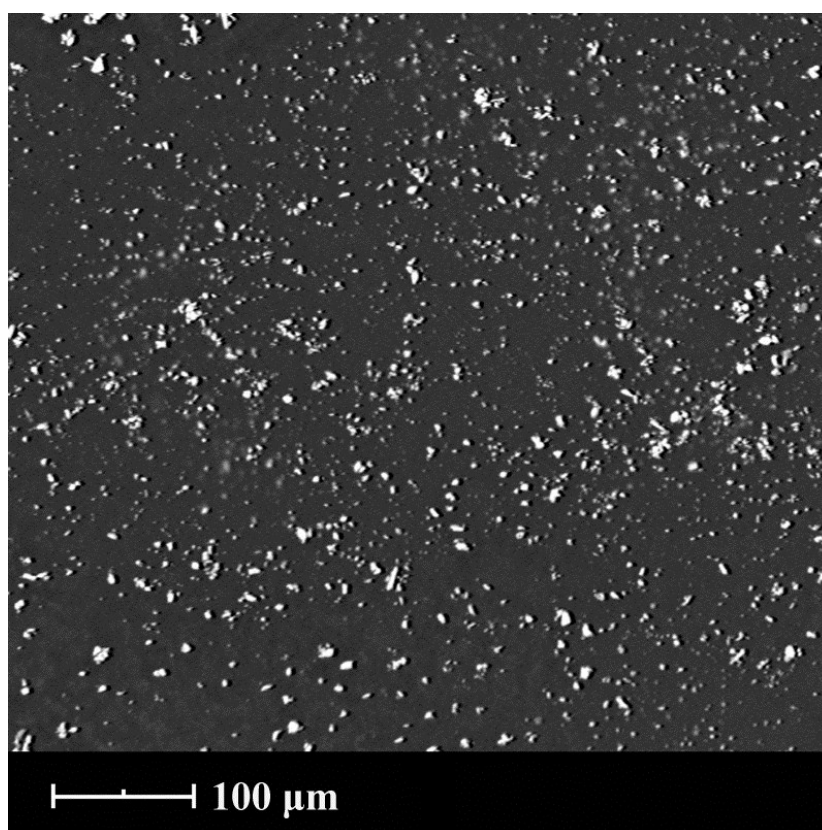

**Figure S2.** SEM image of YAG: 0.06 Ce<sup>3+</sup>, 0.05Mn<sup>2+</sup>, 0.05Si<sup>4+</sup> phosphor

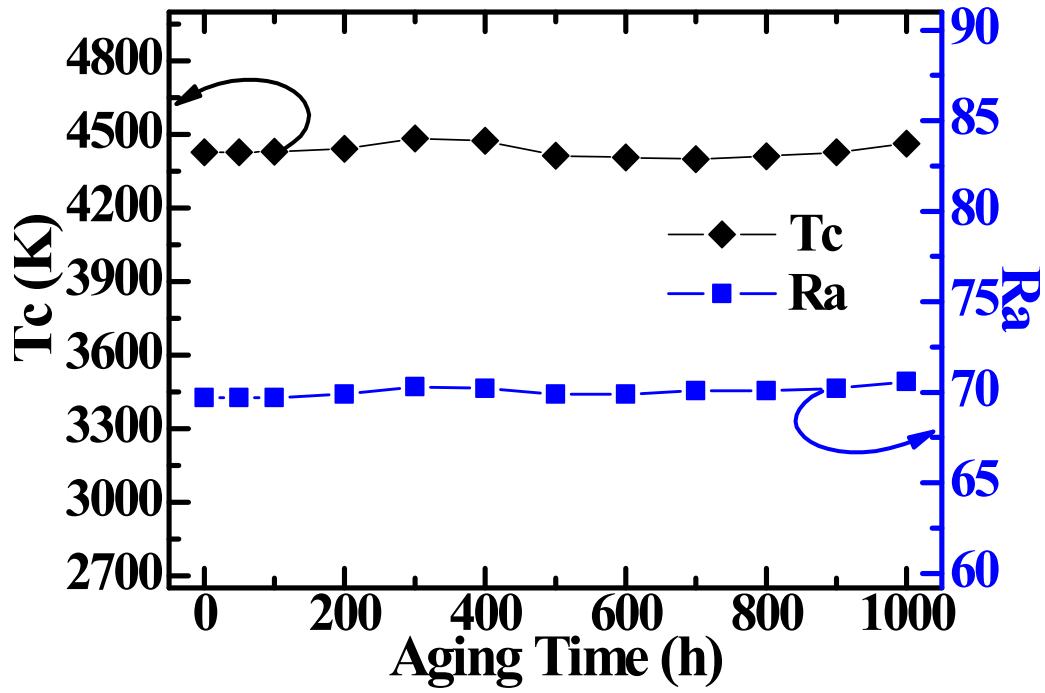

**Figure S3.** The variation of  $T_c$  and  $R_a$  in PiS-based warm w-LED in the aging time prolonging for 1000 h at 150 °C

**Table S1.** Photometric and chromaticity parameters of YAG:0.06Ce<sup>3+</sup>,0.05Mn<sup>2+</sup>,0.05Si<sup>4+</sup> PiG based LED devices with various thickness under 350mA driving current

| Thickness (mm) | LE (lm/W) | Chromaticity coordinate | T <sub>c</sub> (K) | R <sub>a</sub> |
|----------------|-----------|-------------------------|--------------------|----------------|
| 0.5            | 64.96     | (0.316, 0.280)          | 6818               | 79.8           |
| 0.6            | 67.95     | (0.349, 0.331)          | 4769               | 73.5           |
| 0.8            | 70.97     | (0.375, 0.372)          | 4127               | 69.3           |
| 1.0            | 74.22     | (0.392, 0.399)          | 3867               | 67.0           |
| 1.2            | 77.18     | (0.412, 0.431)          | 3656               | 65.2           |

**Table S2.** Photometric and chromaticity parameters of YAG:0.06Ce<sup>3+</sup>,0.05Mn<sup>2+</sup>,0.05Si<sup>4+</sup> PiG based LED devices under various testing current (PiG thickness: 0.8 mm)

| Current (mA) | LE (lm/W) | Chromaticity coordinate | T <sub>c</sub> (K) | R <sub>a</sub> |
|--------------|-----------|-------------------------|--------------------|----------------|
| 20           | 109.01    | (0.385, 0.389)          | 3960               | 70.4           |
| 60           | 100.96    | (0.383, 0.384)          | 3996               | 70.2           |
| 100          | 93.83     | (0.380, 0.380)          | 4033               | 70.1           |
| 200          | 81.55     | (0.377, 0.374)          | 4089               | 69.9           |
| 350          | 70.97     | (0.375, 0.371)          | 4122               | 69.5           |
| 500          | 63.33     | (0.373, 0.369)          | 4156               | 69.3           |
